# Supplementary material for: Prognostic Factors of New-Onset Hypertension in New and Traditional Hypertension Definition in a Large Taiwanese Population Follow-up Study
Source: MDPI journal article supplement (doi:10.3390/ijerph192416525), 2022-12-09
Supplement: s1 [file s1]

**Table S1.** Determinants of follow-up systolic blood pressure using linear regression analysis in new definition population (hypertension was defined as systolic blood pressure  $\geq 130$  mmHg or diastolic blood pressure  $\geq 80$  mmHg)

| Parameter                                  | Univariable                                    |          | Multivariable           |          |
|--------------------------------------------|------------------------------------------------|----------|-------------------------|----------|
|                                            | Unstandardized<br>coefficient $\beta$ (95% CI) | <i>p</i> | OR (95% CI)             | <i>p</i> |
| Age (per 1 year)                           | 0.449 (0.429, 0.469)                           | < 0.001  | 0.420 (0.399, 0.441)    | < 0.001  |
| Male (vs. female)                          | 6.593 (6.115, 7.072)                           | < 0.001  | 5.719 (5.174, 6.264)    | < 0.001  |
| Smoking history                            | 3.037 (2.508, 3.556)                           | < 0.001  | -1.034 (-1.599, -0.469) | < 0.001  |
| Diabetes mellitus                          | 6.787 (5.563, 8.011)                           | < 0.001  | -0.825 (-2.085, 0.435)  | 0.199    |
| Heart rate (per 1 beat/min)                | -0.019 (-0.044, 0.006)                         | 0.145    | —                       | —        |
| Body mass index (per 1 kg/m <sup>2</sup> ) | 1.185 (1.120, 1.249)                           | < 0.001  | 0.930 (0.866, 0.994)    | < 0.001  |
| Fasting glucose (per 1 g/dl)               | 0.137 (0.124, 0.149)                           | < 0.001  | 0.035 (0.021, 0.048)    | < 0.001  |
| Total cholesterol (per 1 mg/dl)            | 0.049 (0.043, 0.055)                           | < 0.001  | 0.009 (0.003, 0.015)    | 0.002    |
| Triglyceride (per 1 mg/dl)                 | 0.035 (0.032, 0.038)                           | < 0.001  | 0.009 (0.006, 0.012)    | < 0.001  |
| eGFR (per 1 ml/ min/1.73 m <sup>2</sup> )  | -0.076 (-0.085, -0.068)                        | < 0.001  | 0.010 (0.002, 0.019)    | 0.02     |

Values expressed as odds ratio (OR) and 95% confidence interval (CI). eGFR, estimated glomerular filtration rate.

**Table S2.** Determinants of follow-up systolic blood pressure using linear regression analysis in traditional definition population (hypertension was defined as systolic blood pressure  $\geq 140$  mmHg or diastolic blood pressure  $\geq 90$  mmHg)

| Parameter                                  | Univariable                                    |          | Multivariable           |          |
|--------------------------------------------|------------------------------------------------|----------|-------------------------|----------|
|                                            | Unstandardized<br>coefficient $\beta$ (95% CI) | <i>p</i> | OR (95% CI)             | <i>p</i> |
| Age (per 1 year)                           | 0.508 (0.488, 0.528)                           | < 0.001  | 0.483 (0.463, 0.503)    | < 0.001  |
| Male (vs. female)                          | 7.687 (7.235, 8.139)                           | < 0.001  | 6.456 (5.947, 6.983)    | < 0.001  |
| Smoking history                            | 3.929 (3.423, 4.434)                           | < 0.001  | -1.027 (-1.567, -0.487) | < 0.001  |
| Diabetes mellitus                          | 6.496 (5.322, 7.669)                           | < 0.001  | -1.442 (-2.636, -0.257) | 0.017    |
| Heart rate (per 1 beat/min)                | 0.012 (-0.013, 0.036)                          | 0.348    | —                       | —        |
| Body mass index (per 1 kg/m <sup>2</sup> ) | 1.303 (1.242, 1.364)                           | < 0.001  | 1.019 (0.959, 1.080)    | < 0.001  |
| Fasting glucose (per 1 g/dl)               | 0.142 (0.131, 0.154)                           | < 0.001  | 0.036 (0.024, 0.048)    | < 0.001  |
| Total cholesterol (per 1 mg/dl)            | 0.054 (0.048, 0.060)                           | < 0.001  | 0.012 (0.006, 0.018)    | < 0.001  |
| Triglyceride (per 1 mg/dl)                 | 0.036 (0.034, 0.039)                           | < 0.001  | 0.010 (0.007, 0.013)    | < 0.001  |
| eGFR (per 1 ml/ min/1.73 m <sup>2</sup> )  | -0.094 (-0.102, -0.085)                        | < 0.001  | 0.008 (-0.001, 0.016)   | 0.072    |

Values expressed as odds ratio (OR) and 95% confidence interval (CI). eGFR, estimated glomerular filtration rate.

**Table S3.** Determinants of follow-up diastolic blood pressure using linear regression analysis in new definition population (hypertension was defined as systolic blood pressure  $\geq 130$  mmHg or diastolic blood pressure  $\geq 80$  mmHg)

| Parameter                                  | Univariable                                    |          | Multivariable                                  |          |
|--------------------------------------------|------------------------------------------------|----------|------------------------------------------------|----------|
|                                            | Unstandardized<br>coefficient $\beta$ (95% CI) | <i>p</i> | Unstandardized<br>coefficient $\beta$ (95% CI) | <i>p</i> |
| Age (per 1 year)                           | 0.046 (0.033, 0.059)                           | < 0.001  | 0.036 (0.023, 0.049)                           | < 0.001  |
| Male (vs. female)                          | 5.039 (4.751, 5.326)                           | < 0.001  | 4.170 (3.824, 4.516)                           | < 0.001  |
| Smoking history                            | 3.224 (2.905, 3.544)                           | < 0.001  | 0.110 (-0.248, 0.468)                          | 0.548    |
| Diabetes mellitus                          | -0.116 (-0.864, 0.632)                         | 0.76     | —                                              | —        |
| Heart rate (per 1 beat/min)                | 0.079 (0.063, 0.094)                           | < 0.001  | 0.090 (0.076, 0.105)                           | < 0.001  |
| Body mass index (per 1 kg/m <sup>2</sup> ) | 0.732 (0.693, 0.771)                           | < 0.001  | 0.573 (0.532, 0.613)                           | < 0.001  |
| Fasting glucose (per 1 g/dl)               | 0.039 (0.031, 0.046)                           | < 0.001  | -0.009 (-0.016, -0.001)                        | < 0.001  |
| Total cholesterol (per 1 mg/dl)            | 0.015 (0.011, 0.018)                           | < 0.001  | 0.008 (0.004, 0.012)                           | < 0.001  |
| Triglyceride (per 1 mg/dl)                 | 0.020 (0.018, 0.022)                           | < 0.001  | 0.006 (0.005, 0.008)                           | < 0.001  |
| eGFR (per 1 ml/ min/1.73 m <sup>2</sup> )  | -0.036 (-0.042, -0.031)                        | < 0.001  | -0.005 (-0.011, 0.000)                         | 0.055    |

Values expressed as odds ratio (OR) and 95% confidence interval (CI). eGFR, estimated glomerular filtration rate.

**Table S4.** Determinants of follow-up diastolic blood pressure using linear regression analysis in traditional definition population (hypertension was defined as systolic blood pressure  $\geq 140$  mmHg or diastolic blood pressure  $\geq 90$  mmHg)

| Parameter                                  | Univariable                                    |          | Multivariable                                  |          |
|--------------------------------------------|------------------------------------------------|----------|------------------------------------------------|----------|
|                                            | Unstandardized<br>coefficient $\beta$ (95% CI) | <i>p</i> | Unstandardized<br>coefficient $\beta$ (95% CI) | <i>p</i> |
| Age (per 1 year)                           | 0.060 (0.047, 0.073)                           | < 0.001  | 0.053 (0.040, 0.066)                           | < 0.001  |
| Male (vs. female)                          | 6.142 (5.871, 6.412)                           | < 0.001  | 5.061 (4.734, 5.389)                           | < 0.001  |
| Smoking history                            | 3.968 (3.662, 4.274)                           | < 0.001  | 0.088 (-0.253, 0.429)                          | 0.614    |
| Diabetes mellitus                          | -0.456 (-1.176, 0.263)                         | 0.214    | —                                              | —        |
| Heart rate (per 1 beat/min)                | 0.103 (0.088, 0.118)                           | < 0.001  | 0.109 (0.095, 0.123)                           | < 0.001  |
| Body mass index (per 1 kg/m <sup>2</sup> ) | 0.846 (0.808, 0.883)                           | < 0.001  | 0.644 (0.606, 0.682)                           | < 0.001  |
| Fasting glucose (per 1 g/dl)               | 0.046 (0.039, 0.053)                           | < 0.001  | -0.010 (-0.017, -0.003)                        | 0.006    |
| Total cholesterol (per 1 mg/dl)            | 0.018 (0.014, 0.022)                           | < 0.001  | 0.010 (0.006, 0.013)                           | < 0.001  |
| Triglyceride (per 1 mg/dl)                 | 0.022 (0.021, 0.024)                           | < 0.001  | 0.007 (0.005, 0.008)                           | < 0.001  |
| eGFR (per 1 ml/ min/1.73 m <sup>2</sup> )  | -0.047 (-0.052, -0.041)                        | < 0.001  | -0.006 (-0.011, 0.000)                         | 0.041    |

Values expressed as odds ratio (OR) and 95% confidence interval (CI). eGFR, estimated glomerular filtration rate.

**Table S5.** Determinants of follow-up pulse pressure using linear regression analysis in new definition population (hypertension was defined as systolic blood pressure  $\geq 130$  mmHg or diastolic blood pressure  $\geq 80$  mmHg)

| Parameter                                  | Univariable                                    |          | Multivariable           |          |
|--------------------------------------------|------------------------------------------------|----------|-------------------------|----------|
|                                            | Unstandardized<br>coefficient $\beta$ (95% CI) | <i>p</i> | OR (95% CI)             | <i>p</i> |
| Age (per 1 year)                           | 0.403 (0.390, 0.417)                           | < 0.001  | 0.385 (0.370, 0.399)    | < 0.001  |
| Male (vs. female)                          | 1.555 (1.212, 1.897)                           | < 0.001  | 1.032 (0.699, 1.365)    | < 0.001  |
| Smoking history                            | -0.187 (-0.560, 0.186)                         | 0.325    | —                       | —        |
| Diabetes mellitus                          | 6.904 (6.047, 7.760)                           | < 0.001  | 1.755 (0.868, 2.642)    | < 0.001  |
| Heart rate (per 1 beat/min)                | -0.097 (-0.115, -0.080)                        | < 0.001  | -0.072 (-0.088, -0.056) | < 0.001  |
| Body mass index (per 1 kg/m <sup>2</sup> ) | 0.453 (0.406, 0.499)                           | < 0.001  | 0.348 (0.303, 0.393)    | < 0.001  |
| Fasting glucose (per 1 g/dl)               | 0.098 (0.089, 0.107)                           | < 0.001  | 0.031 (0.021, 0.040)    | < 0.001  |
| Total cholesterol (per 1 mg/dl)            | 0.034 (0.030, 0.039)                           | < 0.001  | 0.003 (-0.001, 0.008)   | 0.115    |
| Triglyceride (per 1 mg/dl)                 | 0.015 (0.013, 0.017)                           | < 0.001  | 0.002 (0.000, 0.005)    | 0.019    |
| eGFR (per 1 ml/ min/1.73 m <sup>2</sup> )  | -0.040 (-0.046, -0.034)                        | < 0.001  | 0.015 (0.009, 0.021)    | 0.903    |

Values expressed as odds ratio (OR) and 95% confidence interval (CI). eGFR, estimated glomerular filtration rate.

**Table S6.** Determinants of follow-up pulse pressure using linear regression analysis in traditional definition population (hypertension was defined as systolic blood pressure  $\geq 140$  mmHg or diastolic blood pressure  $\geq 90$  mmHg)

| Parameter                                  | Univariable                                    |          | Multivariable          |          |
|--------------------------------------------|------------------------------------------------|----------|------------------------|----------|
|                                            | Unstandardized<br>coefficient $\beta$ (95% CI) | <i>p</i> | OR (95% CI)            | <i>p</i> |
| Age (per 1 year)                           | 0.448 (0.435, 0.461)                           | < 0.001  | 0.429 (0.416, 0.443)   | < 0.001  |
| Male (vs. female)                          | 1.546 (1.232, 1.859)                           | < 0.001  | 0.935 (0.632, 1.239)   | < 0.001  |
| Smoking history                            | -0.039 (-0.384, 0.305)                         | 0.823    | —                      | —        |
| Diabetes mellitus                          | 6.952 (6.160, 7.744)                           | < 0.001  | 1.724 (0.918, 2.529)   | < 0.001  |
| Heart rate (per 1 beat/min)                | -0.091 (-0.108, 0.075)                         | < 0.001  | -0.07 (-0.085, -0.055) | < 0.001  |
| Body mass index (per 1 kg/m <sup>2</sup> ) | 0.457 (0.415, 0.500)                           | < 0.001  | 0.365 (0.325, 0.406)   | < 0.001  |
| Fasting glucose (per 1 g/dl)               | 0.096 (0.088, 0.104)                           | < 0.001  | 0.030 (0.022, 0.038)   | < 0.001  |
| Total cholesterol (per 1 mg/dl)            | 0.036 (0.032, 0.016)                           | < 0.001  | 0.004 (0.001, 0.008)   | 0.027    |
| Triglyceride (per 1 mg/dl)                 | 0.014 (0.012, 0.016)                           | < 0.001  | 0.003 (0.001, 0.005)   | 0.003    |
| eGFR (per 1 ml/ min/1.73 m <sup>2</sup> )  | -0.047 (-0.053, -0.041)                        | < 0.001  | 0.012 (0.006, 0.018)   | < 0.001  |

Values expressed as odds ratio (OR) and 95% confidence interval (CI). eGFR, estimated glomerular filtration rate.

**Table S7.** Determinants of follow-up mean arterial pressure using linear regression analysis in new definition population (hypertension was defined as systolic blood pressure  $\geq 130$  mmHg or diastolic blood pressure  $\geq 80$  mmHg)

| Parameter                                  | Univariable                                    |          | Multivariable           |          |
|--------------------------------------------|------------------------------------------------|----------|-------------------------|----------|
|                                            | Unstandardized<br>coefficient $\beta$ (95% CI) | <i>p</i> | OR (95% CI)             | <i>p</i> |
| Age (per 1 year)                           | 0.180 (0.166, 0.195)                           | < 0.001  | 0.167 (0.152, 0.182)    | < 0.001  |
| Male (vs. female)                          | 5.557 (5.232, 5.882)                           | < 0.001  | 4.687 (4.304, 5.069)    | < 0.001  |
| Smoking history                            | 3.162 (2.801, 3.523)                           | < 0.001  | -0.261 (-0.656, 0.135)  | 0.196    |
| Diabetes mellitus                          | 2.185 (1.343, 3.027)                           | < 0.001  | -2.047 (-2.930, -1.165) | < 0.001  |
| Heart rate (per 1 beat/min)                | 0.046 (0.029, 0.063)                           | < 0.001  | 0.068 (0.052, 0.084)    | < 0.001  |
| Body mass index (per 1 kg/m <sup>2</sup> ) | 0.883 (0.839, 0.927)                           | < 0.001  | 0.693 (0.648, 0.738)    | < 0.001  |
| Fasting glucose (per 1 g/dl)               | 0.071 (0.063, 0.080)                           | < 0.001  | 0.013 (0.004, 0.023)    | 0.004    |
| Total cholesterol (per 1 mg/dl)            | 0.026 (0.022, 0.030)                           | < 0.001  | 0.007 (0.003, 0.012)    | 0.001    |
| Triglyceride (per 1 mg/dl)                 | 0.025 (0.023, 0.027)                           | < 0.001  | 0.007 (0.005, 0.009)    | < 0.001  |
| eGFR (per 1 ml/ min/1.73 m <sup>2</sup> )  | -0.050 (-0.056, -0.044)                        | < 0.001  | 0.000 (-0.006, 0.006)   | 0.903    |

Values expressed as odds ratio (OR) and 95% confidence interval (CI). eGFR, estimated glomerular filtration rate.

**Table S8.** Determinants of follow-up mean arterial pressure using linear regression analysis in traditional definition population (hypertension was defined as systolic blood pressure  $\geq 140$  mmHg or diastolic blood pressure  $\geq 90$  mmHg)

| Parameter                                  | Univariable                                    |          | Multivariable           |          |
|--------------------------------------------|------------------------------------------------|----------|-------------------------|----------|
|                                            | Unstandardized<br>coefficient $\beta$ (95% CI) | <i>p</i> | OR (95% CI)             | <i>p</i> |
| Age (per 1 year)                           | 0.209 (0.195, 0.224)                           | < 0.001  | 0.201 (0.187, 0.215)    | < 0.001  |
| Male (vs. female)                          | 6.657 (6.348, 6.965)                           | < 0.001  | 5.529 (5.164, 5.894)    | < 0.001  |
| Smoking history                            | 3.955 (3.607, 4.303)                           | < 0.001  | -0.271 (-0.650, 0.109)  | 0.163    |
| Diabetes mellitus                          | 1.861 (1.046, 2.676)                           | < 0.001  | -2.689 (-3.524, -1.854) | < 0.001  |
| Heart rate (per 1 beat/min)                | 0.072 (0.055, 0.089)                           | < 0.001  | 0.088 (0.073, 0.104)    | < 0.001  |
| Body mass index (per 1 kg/m <sup>2</sup> ) | 0.998 (0.956, 1.040)                           | < 0.001  | 0.770 (0.728, 0.813)    | < 0.001  |
| Fasting glucose (per 1 g/dl)               | 0.078 (0.070, 0.086)                           | < 0.001  | 0.014 (0.006, 0.023)    | 0.001    |
| Total cholesterol (per 1 mg/dl)            | 0.030 (0.026, 0.034)                           | < 0.001  | 0.009 (0.005, 0.013)    | < 0.001  |
| Triglyceride (per 1 mg/dl)                 | 0.027 (0.025, 0.029)                           | < 0.001  | 0.007 (0.006, 0.009)    | < 0.001  |
| eGFR (per 1 ml/ min/1.73 m <sup>2</sup> )  | -0.062 (-0.068, -0.056)                        | < 0.001  | -0.001 (-0.007, 0.004)  | 0.629    |

Values expressed as odds ratio (OR) and 95% confidence interval (CI). eGFR, estimated glomerular filtration rate.
